# Supplementary material for: Two pathways of how remote SST anomalies drive the interannual variability of autumnal haze days in the Beijing–Tianjin–Hebei region, China
Source: Copernicus journal article supplement (doi:10.5194/acp-19-1521-2019), 2019-02-06
Supplement: Supplementary file 1 [file acp-19-1521-2019-supplement.pdf]

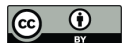

*Supplement of*

**Two pathways of how remote SST anomalies drive the interannual variability of autumnal haze days in the Beijing–Tianjin–Hebei region, China**

**Jing Wang et al.**

*Correspondence to:* Zhiwei Zhu (zwz@nuist.edu.cn)

The copyright of individual parts of the supplement might differ from the CC BY 4.0 License.

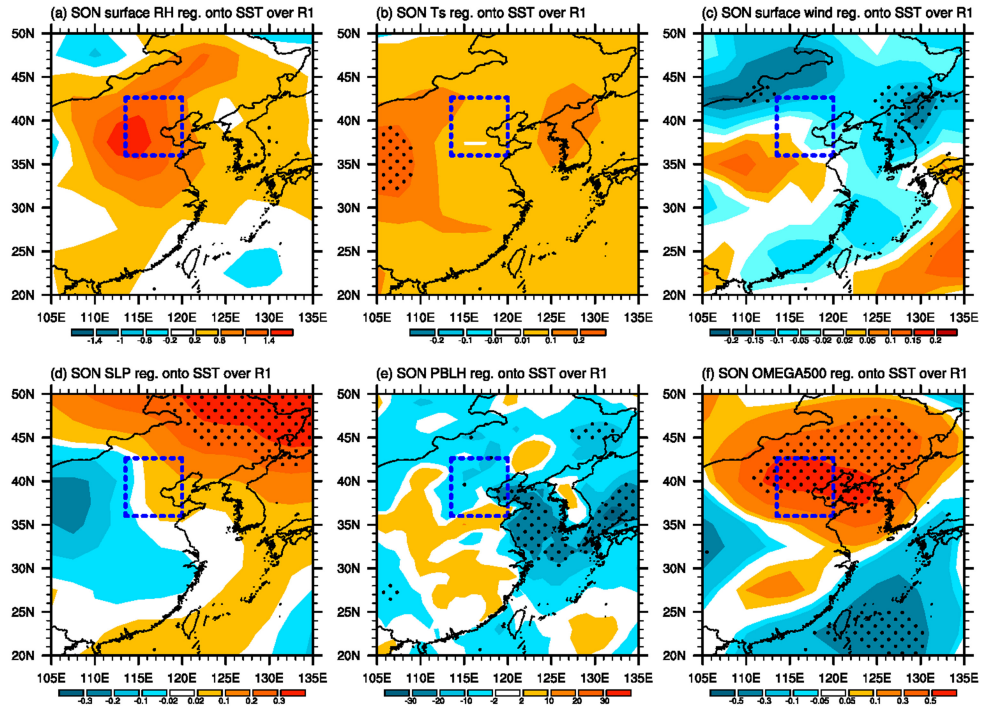

Figure S1. As in Fig. 4, but for SST over R1.

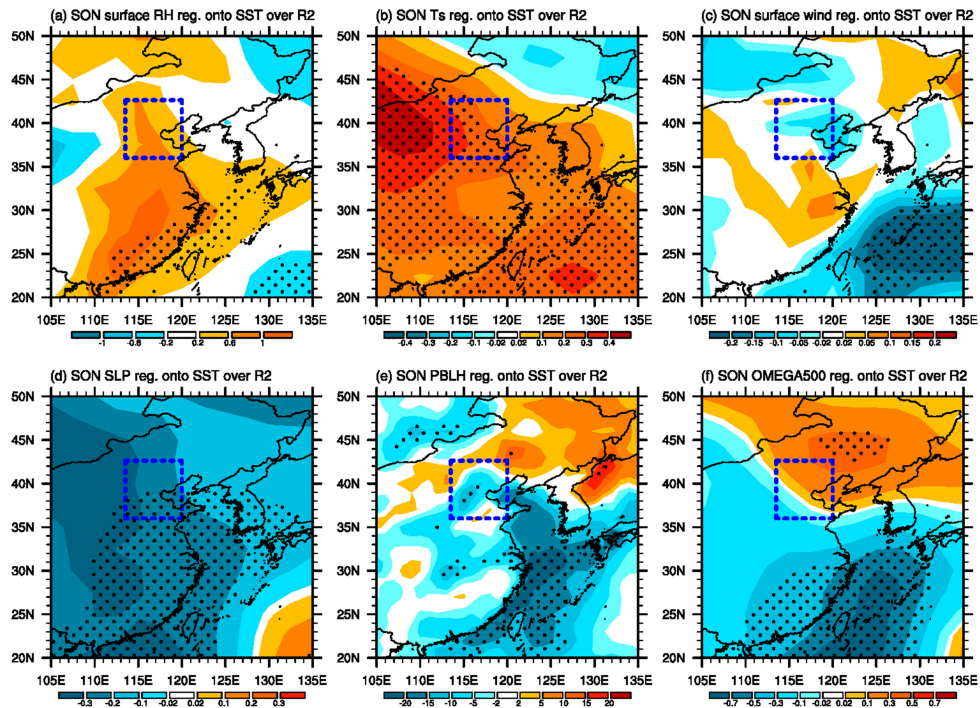

Figure S2. As in Fig. 4, but for SST over R2.
